# Supplementary material
Source: publisher site journal article supplement (http://edge.sagepub.com/sites/default/files/Appendix_6.pdf)

# Appendix 6

## Text Structures for Desperation

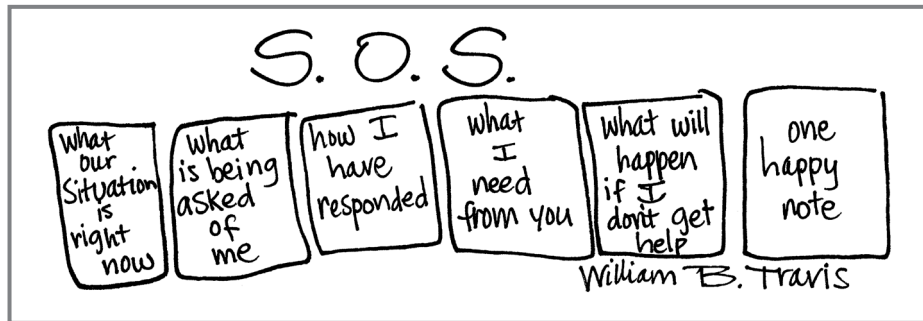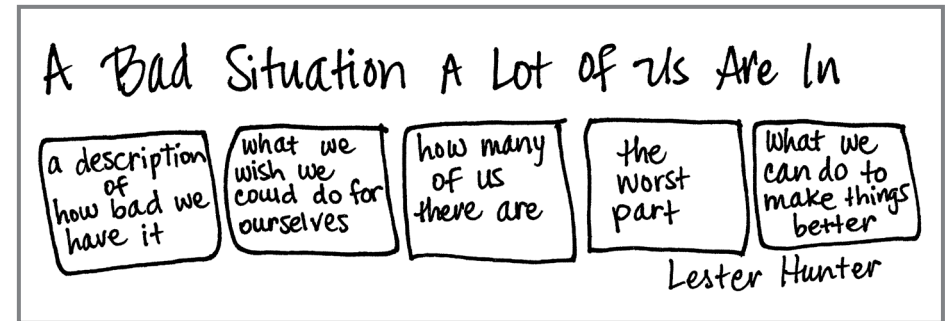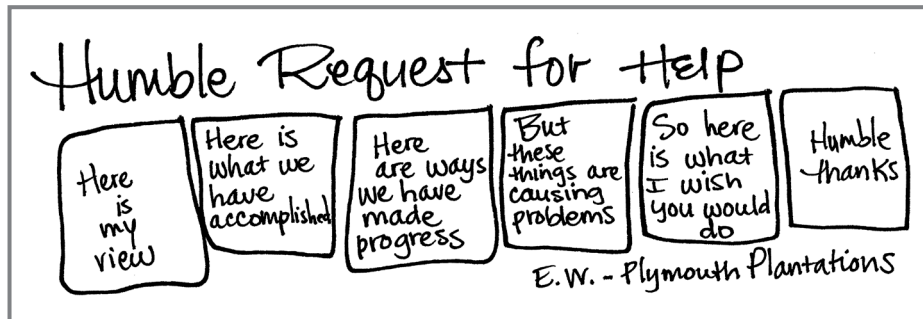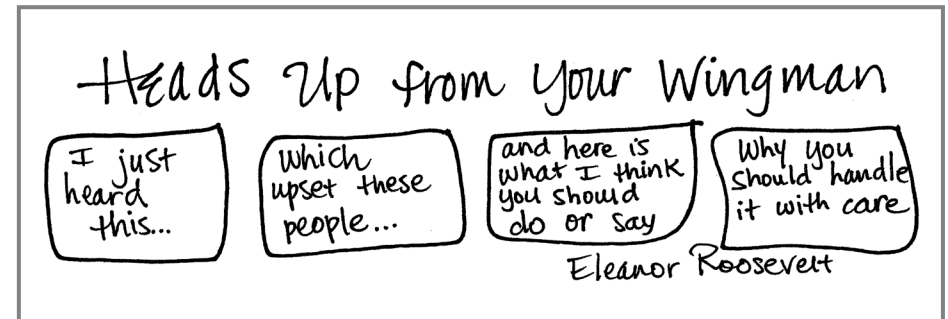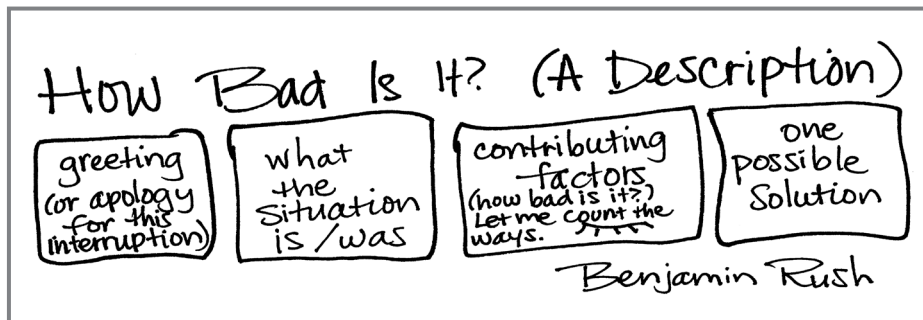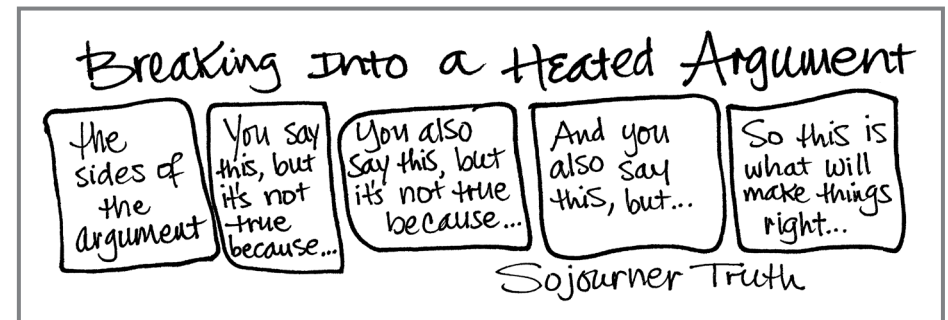

Supplement: Supplementary file 1 [file Appendix_6.pdf]
